# Supplementary material
Source: MDPI journal article supplement (https://www.mdpi.com/2037-0164/13/2/12)
Supplement: s1 [file s1]

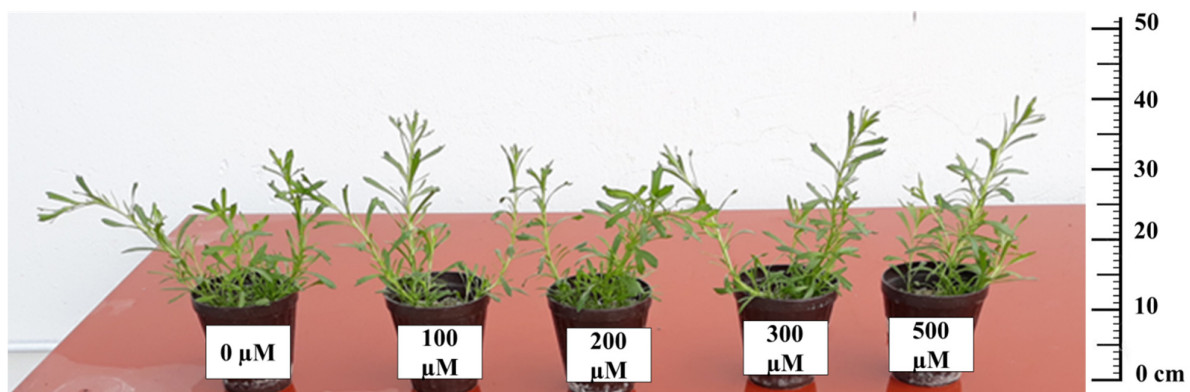

**Figure S1.** Morphological aspect of *Limbarda crithmoides* after 45 days of barium exposure.

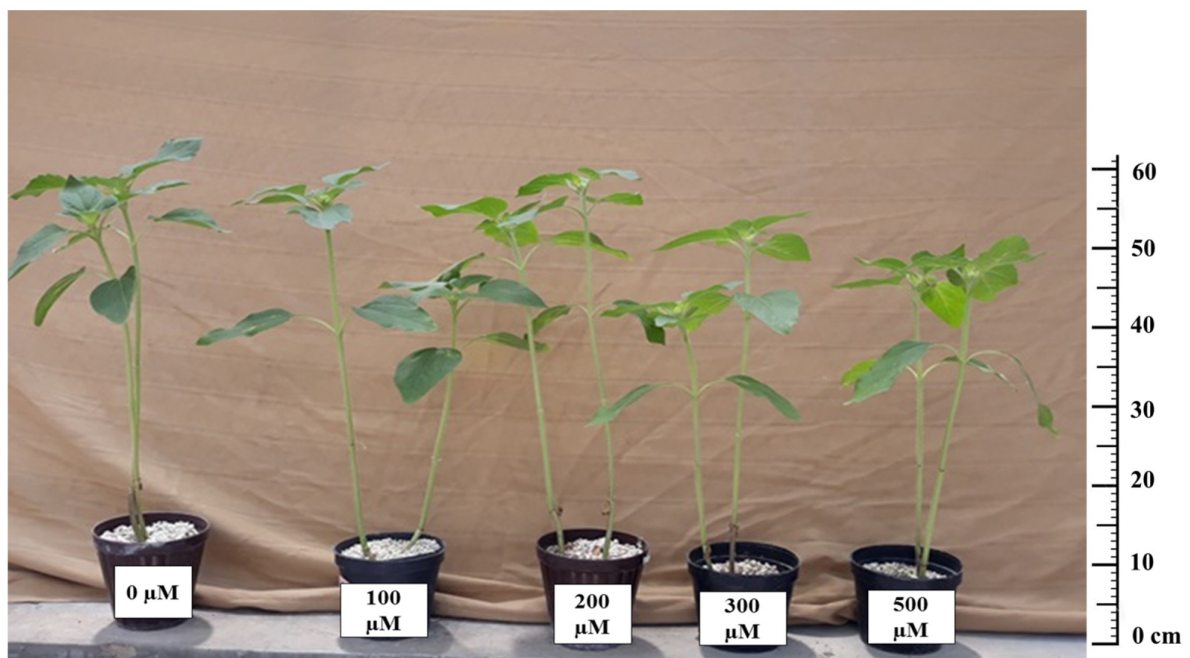

**Figure S2.** Morphological aspect of *Helianthus annuus* after 45 days of barium exposure.
